# **Conformational control of translation termination on the 70S ribosome**

Egor Svidritskiy<sup>1</sup> and Andrei A. Korostelev<sup>1,\*</sup>

<sup>1</sup>RNA Therapeutics Institute, University of Massachusetts Medical School, 368 Plantation St.,  
Worcester, MA 01605, USA.

*\*Correspondence: [andrei.korostelev@umassmed.edu](mailto:andrei.korostelev@umassmed.edu)*

## Abstract

Translation termination ensures proper lengths of cellular proteins. During termination, release factor (RF) recognizes a stop codon and catalyzes peptide release. Conformational changes in RF are thought to underlie accurate translation termination. If true, the release factor should bind the A-site codon in inactive (compact) conformation(s), but structural studies of ribosome termination complexes have only captured RFs in an extended, active conformation. Here, we identify a hyper-accurate RF1 variant, and present crystal structures of 70S termination complexes that suggest a structural pathway for RF1 activation. In the presence of blasticidin S, the catalytic domain of RF1 is removed from the peptidyl-transferase center, whereas the codon-recognition domain is fully engaged in stop-codon recognition in the decoding center. RF1 codon recognition induces decoding-center rearrangements that precede accommodation of the catalytic domain. Our findings suggest how structural dynamics of RF1 and the ribosome coordinate stop-codon recognition with peptide release, ensuring accurate translation termination.

**Keywords:** class I release factors, closed RF1, stop-codon recognition, termination accuracy, blasticidin S

## Introduction

Accurate translation termination prevents the premature release and accumulation of potentially toxic polypeptides. At the end of translation, protein release factor (RF) binds the stop codon of an mRNA in the ribosomal A (aminoacyl-tRNA) site and catalyzes the hydrolysis of peptidyl-tRNA, releasing the complete polypeptide. In eubacteria, RF1 recognizes the UAA and UAG stop codons, whereas RF2 recognizes the UAA and UGA stop codons (reviewed in refs (1-5)). High fidelity of translation termination by RF1 and RF2, with error rates in the range of  $10^{-3}$  to  $10^{-6}$  (6), equals to or exceeds that of aminoacyl-tRNA (aa-tRNA) incorporation by elongation factor EF-Tu. Accurate decoding of aa-tRNA•EF-Tu requires GTP hydrolysis (7, 8), which separates accommodation of cognate tRNA and dissociation of non-cognate tRNA (9). By contrast, accurate termination by RF1 and RF2 does not employ GTP (6, 10).

One model to explain the accuracy of translation termination is that stop-codon recognition triggers a large-scale conformational rearrangement that activates release factor (11-14). Many structural studies of 70S ribosome termination complexes formed with RF1 or RF2 (11, 12, 15-21) have revealed an active, i.e. extended, conformation of release factor. In this conformation, the codon-recognition domain II of RF is bound to the stop codon in the 30S A site. Here, the conserved ribosomal decoding-center nucleotides A1492, A1493 (16S rRNA) and A1913 (23S rRNA) adopt a conformation characteristic of 70S termination complexes (18, 19). The catalytic domain III of RF contains a long helix  $\alpha 7$  that bridges the ribosomal subunits. The conserved catalytic GGQ motif at the tip of domain III binds next to the CCA 3'-end of the P-site tRNA in the peptidyl-transferase center of the 50S subunit to mediate peptidyl-tRNA hydrolysis (11, 15, 17-20). Recent biochemical and biophysical data suggest that RF initially samples the ribosomal A site in a conformation that is different from the fully extended one (13, 14). Crystal structures of free RF1 and RF2 have revealed a compact conformation (22-24), but this conformation is sterically incompatible with a fully accommodated codon-recognition domain (18). In solution, free release factors might sample compact or partially extended conformations that are compatible with initial binding in the ribosomal A site (25, 26). However, so far only the fully extended conformation has been captured on the terminating ribosome by electron cryo-microscopy (cryo-EM) or X-ray

crystallography. Recently, ribosome rescue complexes formed with alternative rescue factor ArfA captured a compact conformation of RF2 (27, 28). The rescue complex, however, depends on recognition of a truncated (non-stop) mRNA by ArfA, so these structures do not provide insight into how stop-codon recognition mediates peptide release. Thus, structures of RF intermediates that support conformational control of translation termination on stop codons remain elusive.

If conformational rearrangement of release factor underlies termination fidelity, then release factor should initially bind the ribosome with its codon-recognition domain in the decoding center, while the catalytic domain is not yet activated to present the GGQ motif in the peptidyl-transferase center. Therefore, perturbation of RF1 dynamics or perturbation of the catalytic domain binding to the 50S subunit may change the efficiency of termination and yield pre-activation-like states. To test this hypothesis, we first identified a hyper-accurate variant of RF1 ( $\Delta 302-304$  RF1; RF1<sub>ha</sub>), whose discrimination against sense codons exceeds that of wild-type RF1. We then employed RF1<sub>ha</sub> to capture distinct termination complexes by X-ray crystallography. To induce a pre-activation-like state, we used the termination inhibitor blasticidin S (BlaS). BlaS intercalates within the CCA end of the P-site tRNA in the peptidyl-transferase center, resulting in partial occlusion of the A site on the 50S subunit (29). We reasoned that BlaS might prevent the catalytic domain of RF1<sub>ha</sub> from stably binding the 50S subunit, providing insights into early steps of termination.

## Results and Discussion

### **$\Delta 302-304$ RF1 (RF1<sub>ha</sub>) demonstrates enhanced discrimination against sense codons**

In release factors, the codon-recognition superdomain (domains II and IV) is connected to catalytic domain III via a non-conserved loop, termed the switch loop (aa 291-307 of *E. coli* RF1; (11, 18)). In structures of 70S termination complexes (11, 15, 17, 18, 20, 21), the switch loop interacts with decoding-center nucleotides A1492 and A1493 of 16S rRNA and helix 69 (capped with A1913) of 23S rRNA (11, 18). These nucleotides adopt termination-specific conformations, which differ from those observed with a vacant A site (30). Presently, it is unclear whether the switch loop contributes to the decoding-

center conformational change that is compatible with extended activated RF in the 70S complex (1). The switch loop does not bind the stop codon in 70S structures, consistent with our previous finding that RF1 variants with mutations in the switch loop retain peptide release activity (18). When combined with a deletion of helix 69, however, RF1 with a shortened switch loop ( $\Delta 302-304$ ) had a substantially slower rate-limiting step in peptide release (18). Because the switch loop connects the two functional domains of

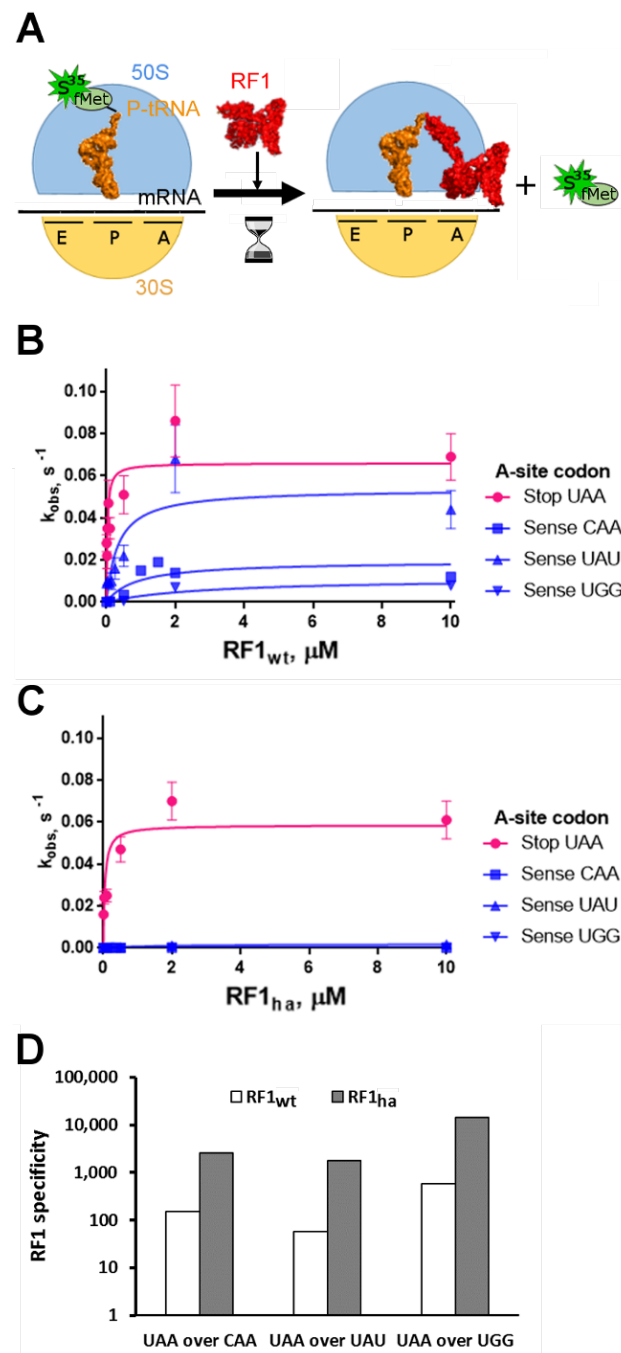

RF, we hypothesized that the rate-limiting step could be a conformational change that directs domain III into the peptidyl-transferase center (18). If the  $\Delta 302-304$  RF1 variant slows a critical conformational change, we now asked whether the  $\Delta 302-304$  RF1 variant might be more discriminatory than RF1<sub>wt</sub> against sense codons.

**Figure 1. Comparison of termination efficiencies and specificities of *E. coli* RF1<sub>wt</sub> and  $\Delta 302-304$  RF1 (RF1<sub>ha</sub>) on 70S ribosomes with a stop or sense codon in the A site.** (A) Schematic of the experiment to study the kinetics of formyl-methionine release by RF1 from the 70S ribosome bound with fMet-tRNA<sup>fMet</sup> (see Methods). (B, C) Michaelis – Menten curves for RF1<sub>wt</sub> (B) and  $\Delta 302-304$  RF1 (RF1<sub>ha</sub>) (C);  $k_{obs}$  denotes the observed rate constants; error bars represent standard errors obtained from duplicate experiments. (D) Specificities,  $(k_{cat}/K_M)^{stop} / (k_{cat}/K_M)^{sense}$ , of release by RF1<sub>wt</sub> and  $\Delta 302-304$  RF1 (RF1<sub>ha</sub>) from the pre-termination ribosome complex (with the UAA stop codon) vs. the elongation complex (with near-stop sense codons), shown on a logarithmic scale.

To test the above hypothesis, we used an established *in vitro* kinetic assay (19) that monitors the release of formyl-methionine from the 70S ribosome bound with [<sup>35</sup>S]-fMet-tRNA<sup>fMet</sup> in the P site (Fig. 1A). We compared the release kinetics of wild-type RF1 and  $\Delta$ 302-304 RF1 from the UAA stop codon or the sense codons CAA, UGG, UAU (Table 1) – i.e., *near-stop* codons that differ from UAA or UAG stop codons in the first, second, or third nucleotide position. Both wild-type and mutant RF1 induced fast release on the UAA codon (Fig. 1B, 1C). The release efficiency ( $k_{\text{cat}}/K_M$ ) of RF1<sub>wt</sub> on near-stop codons was readily detectable but reduced by ~100- to 1000-fold (Fig. 1B), consistent with reported observations (6). By contrast, the activity of  $\Delta$ 302-304 RF1 on near-stop codons was virtually undetectable (Fig. 1C). We estimate the specificity – defined as  $(k_{\text{cat}}/K_M)^{\text{stop}} / (k_{\text{cat}}/K_M)^{\text{sense}}$  – of  $\Delta$ 302-304 RF1 to be ~10- to 100-fold higher than that of RF1<sub>wt</sub> (Fig. 1D, Table 1). Thus, destabilizing the switch-loop interactions with the 30S decoding center dramatically increased the accuracy of stop-codon recognition.

### Hyper-accurate RF1<sub>ha</sub> is dynamic in the A site

To understand the structural basis of the extraordinary termination fidelity of the hyper-accurate  $\Delta$ 302-304 RF1 variant (termed RF1<sub>ha</sub>), we determined crystal structures of 70S•RF1<sub>ha</sub> termination complexes formed on a UAA stop codon in the absence (Fig. 2A, 2B) and presence of BlaS (Fig. 2C, 2D), at 3.55-Å and 3.4-Å resolutions, respectively (Table 2). We reasoned that destabilizing the GGQ binding at the peptidyl-transferase center by BlaS might increase our chances of capturing an elusive pre-activation conformation of the high-fidelity enzyme. In the absence of BlaS (Fig. 2A), RF1<sub>ha</sub> adopts an extended (activated) conformation (Fig. 3A) nearly identical to that of RF1<sub>wt</sub> observed in canonical termination complexes (11, 19). This finding is consistent with our observation that the catalytic activity of RF1<sub>ha</sub> on the stop codon is similar to that of RF1<sub>wt</sub> (Fig. 1B-C). The position of the GGQ motif in the peptidyl-transferase center (Fig. 3B) and recognition of the stop codon (Fig. 3C) are similar to those in canonical termination complexes (11, 19), as expected. The interactions of RF1<sub>ha</sub> with the decoding center are destabilized due to shortening of the switch loop (Fig. 3D), however the conformations of decoding center nucleotides A1492, A1493 and A1913 are similar to those in canonical termination complexes.



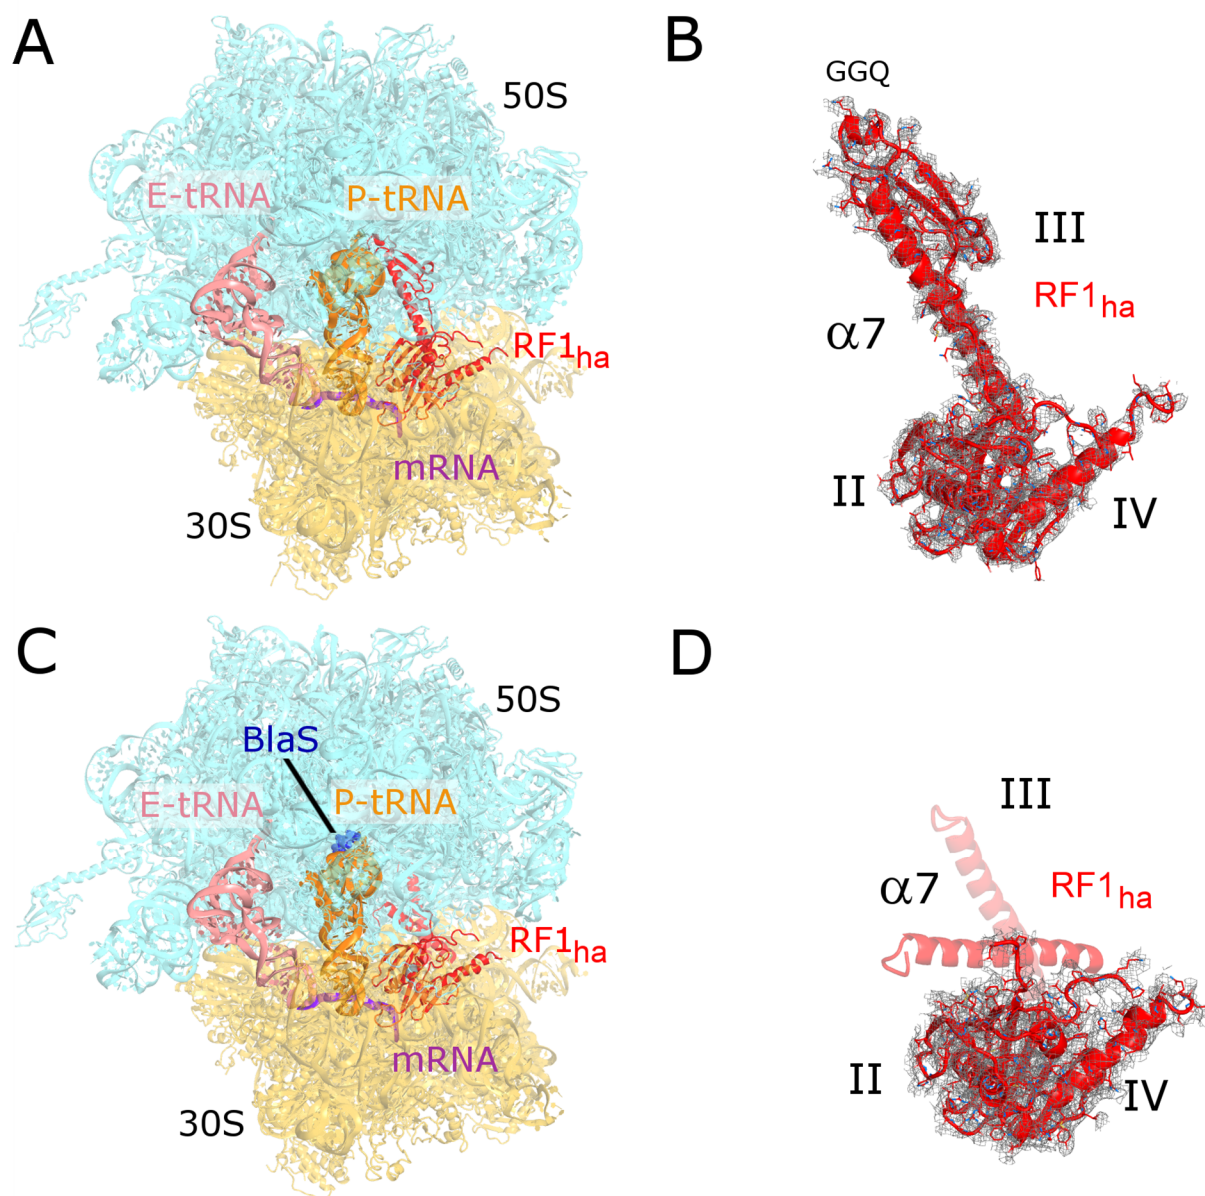

**Figure 2. Crystal structures of RF1<sub>ha</sub> bound to the 70S ribosome in the presence or absence of BlaS.** (A) Structure of RF1<sub>ha</sub> bound to the ribosome in the absence of BlaS. RF1<sub>ha</sub> adopts an extended conformation. (B) Close-up view of the release factor and unbiased F<sub>o</sub>-F<sub>c</sub> densities is shown for RF1<sub>ha</sub> bound to the ribosome in the absence of BlaS. (C) Structure of RF1<sub>ha</sub> bound to the 70S ribosome in the presence of BlaS. The codon-recognition superdomain (domains II and IV) is bound at the 30S subunit, whereas domain III has partial occupancy in a compact and a partially extended state. (D) Close-up view of the release factor and unbiased F<sub>o</sub>-F<sub>c</sub> densities is shown for RF1<sub>ha</sub> bound to the ribosome in the presence of BlaS (see Fig. 4 for additional density views).

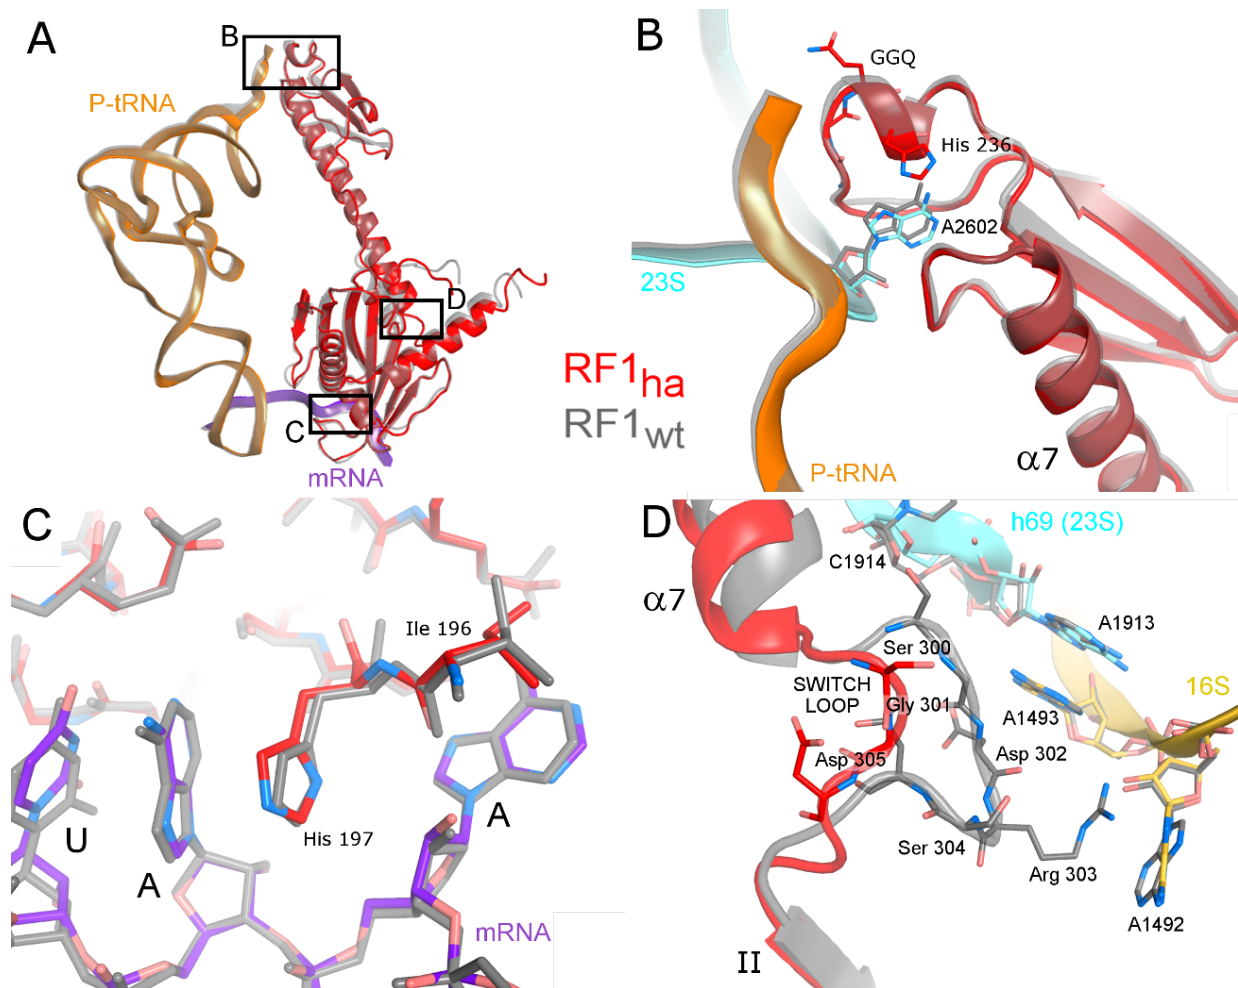

**Figure 3. Interactions of RF1<sub>ha</sub> with the ribosome in the absence of BlaS.** (A) Alignment of RF1, P-site tRNA and mRNA from the 70S complexes with RF1<sub>ha</sub> and RF1<sub>wt</sub> shows that RF1<sub>ha</sub> adopts the extended conformation characteristic of canonical termination complexes. (B-C) Conformation of RF1<sub>ha</sub> is similar to that of RF1<sub>wt</sub> in: (B) the peptidyl-transferase center and (C) the stop-codon-recognition region. (D) Positions of the switch loop of RF1<sub>wt</sub> and RF1<sub>ha</sub> in the decoding center. The switch loop of wild-type RF1 packs to interact with decoding-center nucleotides, whereas the shortened switch loop of RF1<sub>ha</sub> does not interact with decoding-center nucleotides. The structure with RF1<sub>ha</sub> is colored (this work) and the structure with RF1<sub>wt</sub> is gray (19) (PDB ID 5J4D). The superposition was achieved by structural alignment of 16S rRNAs.

In the presence of BlaS (Fig. 2C, 2D), strong unbiased Fourier difference density reveals that the codon-recognition superdomain of RF1<sub>ha</sub> (Fig. 4A, 4B) is rotated by ~5° around the stop codon relative to that of wild-type RF1 (Fig. 4D). By contrast, weak density in the intersubunit space suggests partial occupancies for domain III outside of the peptidyl-transferase center (Fig. 4A, 4B), which is bound with BlaS at the same position as in the 70S structure lacking RF1 (29). Although detailed interpretation of these partial occupancies of domain III is difficult due to poor map resolution in this



region, it is clear that there is no density corresponding to the docked position of helix  $\alpha 7$ . Instead, the density is consistent with at least two positions of  $\alpha 7$ , suggesting a partially extended (mid-open) state of domain III and a compact (closed) domain III (Fig. 4B). The partially extended position of helix  $\alpha 7$  deviates from the normally extended conformation by  $\sim 20^\circ$  and is inconsistent with accommodation of the GGQ motif in the peptidyl-transferase center (Fig. 4D). In free release factors, the compact conformation is stabilized by hydrophobic interactions (Fig. 4C) involving O-methyl-serine (Mse) 151, Val 165 and Ile 114 in domain II and Ile 274 of helix  $\alpha 7$  in domain III (*Streptococcus mutans* RF1 (24)). These interactions are disrupted in the fully extended release factors (11, 15, 17-20). In our structure, density in this region (Fig. 4B, 4C) suggests that a fraction of release factors in the crystal may retain some of these interactions, inducing the rotation of the codon-recognition superdomain (Fig. 4D). The steric clash with the P-site tRNA likely forces the GGQ-bearing tip of domain III to displace from its compact conformation, resulting in conformational heterogeneity of domain III. In summary, this structure demonstrates that helix  $\alpha 7$  and the GGQ motif are disengaged from the 50S subunit and are destabilized in the intersubunit space.

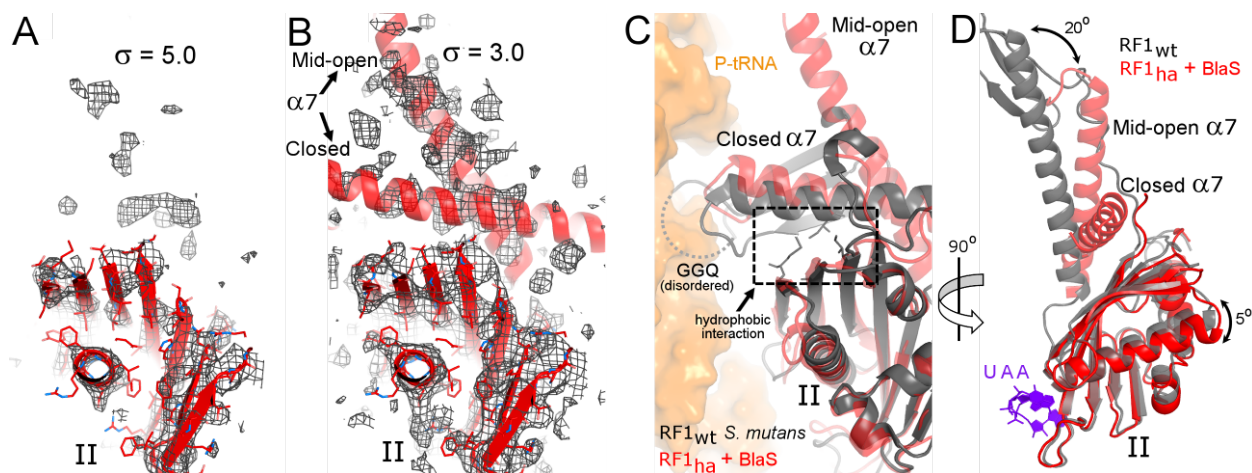

**Figure 4. Helix  $\alpha 7$  of the catalytic domain III of RF1<sub>ha</sub> is disengaged from the 50S subunit in the presence of BlaS.** (A) Unbiased  $F_o-F_c$  density (gray mesh) suggests mobility of  $\alpha 7$ , while the codon-recognition domain II is resolved (at  $\sigma=5.0$ ). (B) Low putative occupancies of  $\alpha 7$  in the partially extended (mid-open) and compact (closed) conformations are suggested at lower density levels ( $\sigma=3.0$ ). (C) Comparison of RF1<sub>ha</sub> with free (ribosome-unbound) *S. mutans* RF1 (24) (PDB ID 1ZBT; gray) docked into the A site by structural alignment of domains II. Hydrophobic side-chains are shown as sticks. (D) Both conformations are inconsistent with docking of  $\alpha 7$  into the peptidyl-transferase center (gray model shows the extended (active) conformation of wild-type RF1 (19) (PDB ID 5J4D)).

Despite being bound with the rotated codon-recognition domain and dynamic domain III of RF1<sub>ha</sub>, the decoding center of the ribosome adopts the same conformation as in canonical termination complexes. The structure therefore shows that the binding of the codon-recognition domain alone is sufficient to stabilize the termination-specific conformation of the decoding center (Fig. 5).

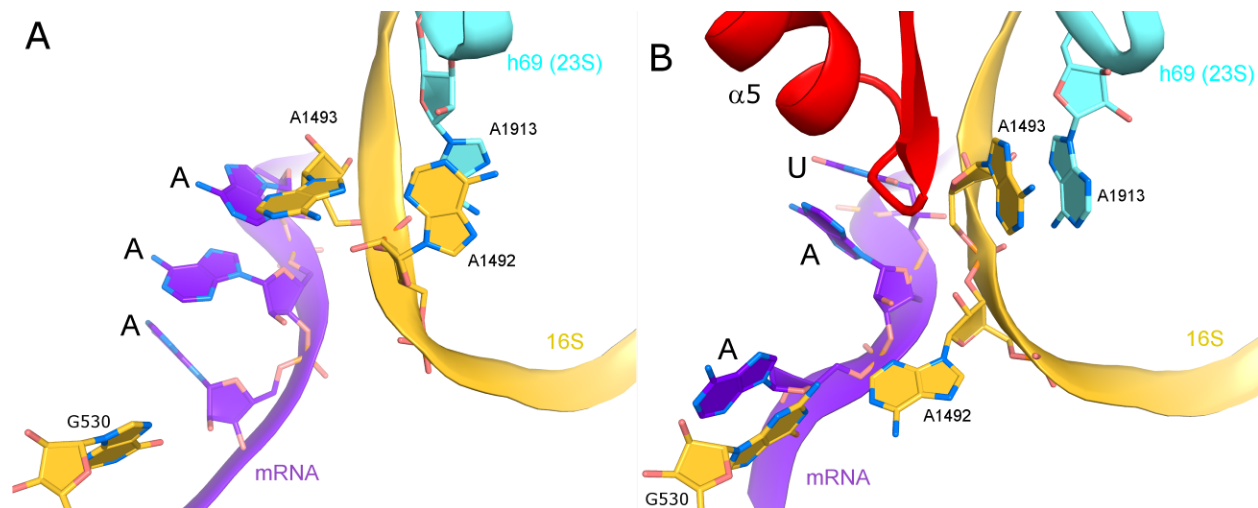

**Figure 5. Comparison of the decoding-center nucleotides in the absence (A; (30)) and presence of RF1<sub>ha</sub> (B; without *BlaS*), showing that rearrangement of A1493 is required for the binding of the codon-recognition domain of release factor.**

### Conformational control of termination fidelity

New conformations of a release factor captured in our structures provide insight into the mechanism of termination fidelity. They show that the codon-recognition domain can bind the 30S subunit and induce decoding-center rearrangements independently of the switch loop and GGQ accommodation in the peptidyl-transferase center. Moreover, the dynamics of RF1<sub>ha</sub> are consistent with the hypothesis that release factors undergo a large conformational change upon binding to the stop codon.

Our structures suggest that two principal rearrangements determine the mechanism of termination (Fig. 6): those in the 30S decoding center and those in the release factor. During elongation, release factors sample the ribosome in a somewhat compact

conformation (13, 14), perhaps similar to that reported in crystal structures of free release factors (22-24) or compact RF2 bound to the ribosome in the presence of ArfA (27, 28). Prior to RF binding, the decoding-center conformation is incompatible with bound RF. Specifically, crystallographic (30) and cryo-EM (31, 32) structures of the ribosome with a vacant A site show the codon interacting with A1493, which bulges from helix 44 (h44) of 16S rRNA, while A1492 is stacked on A1913 within h44 (Fig. 5A). In this conformation, A1493 would clash with the accommodated RF (Fig. 5B). We propose that transient interaction of RF with a sense codon is insufficient to stabilize the codon-recognition domain on the 30S subunit and induce decoding-center rearrangements compatible with RF binding. In this case, the decoding-center conformation would favor RF dissociation (33) prior to RF domain rearrangement, thus preventing premature termination (Fig. 6B). This idea is consistent with independent proposals that a conformational rearrangement is the rate-limiting step (13, 18, 34). In rare cases, however, RF can induce decoding-center rearrangements on a sense codon and sample the extended state, resulting in premature termination (10) (Fig. 6A).

When the ribosome reaches the end of the open reading frame, the codon-recognition domain of a release factor stably binds to the 30S A site due to specific interactions with the stop codon. The binding of the codon-recognition domain of RF is coupled with swapping of A1493 with A1492, so that A1493 stacks on A1913 and A1492 bulges out of h44 (Fig. 6B). Our structures demonstrate that interaction of the switch loop or the extended domain III with the decoding center are not required for this decoding-center rearrangement. Thus, the binding of the codon-recognition domain to the stop codon stabilizes the rearranged decoding-center nucleotides prior to the activation of RF.

Stable binding to the stop codon provides an opportunity for domain III to disengage from the codon-recognition superdomain and sample different conformations in the intersubunit space. The loss of hydrophobic interactions between domains II and III is compensated by new interactions between the switch loop and the decoding center, and between the extended domain III and the large subunit. The insertion of the GGQ motif into the peptidyl-transferase center is coupled with changes in peptidyl-transferase-center nucleotide conformations, as described earlier (reviewed in (1)). We have recently determined the structure of the 70S complex formed with wild-type RF1

and BlaS (35). The structure revealed that BlaS perturbs the peptidyl-transferase center and shifts the GGQ motif of RF1 without destabilizing the catalytic domain overall. Our current work demonstrates that perturbation of the switch loop by mutation shifts the equilibrium away from the extended conformation. Thus, the wild-type switch loop plays a critical role in stabilizing the extended active RF1 conformation in the ribosome. Our biochemical data suggest that stabilization of the extended RF1 conformation reduces termination fidelity but likely provides a kinetic advantage under cellular conditions, thereby balancing the accuracy of termination, the optimal translation rate and ribosome recycling.

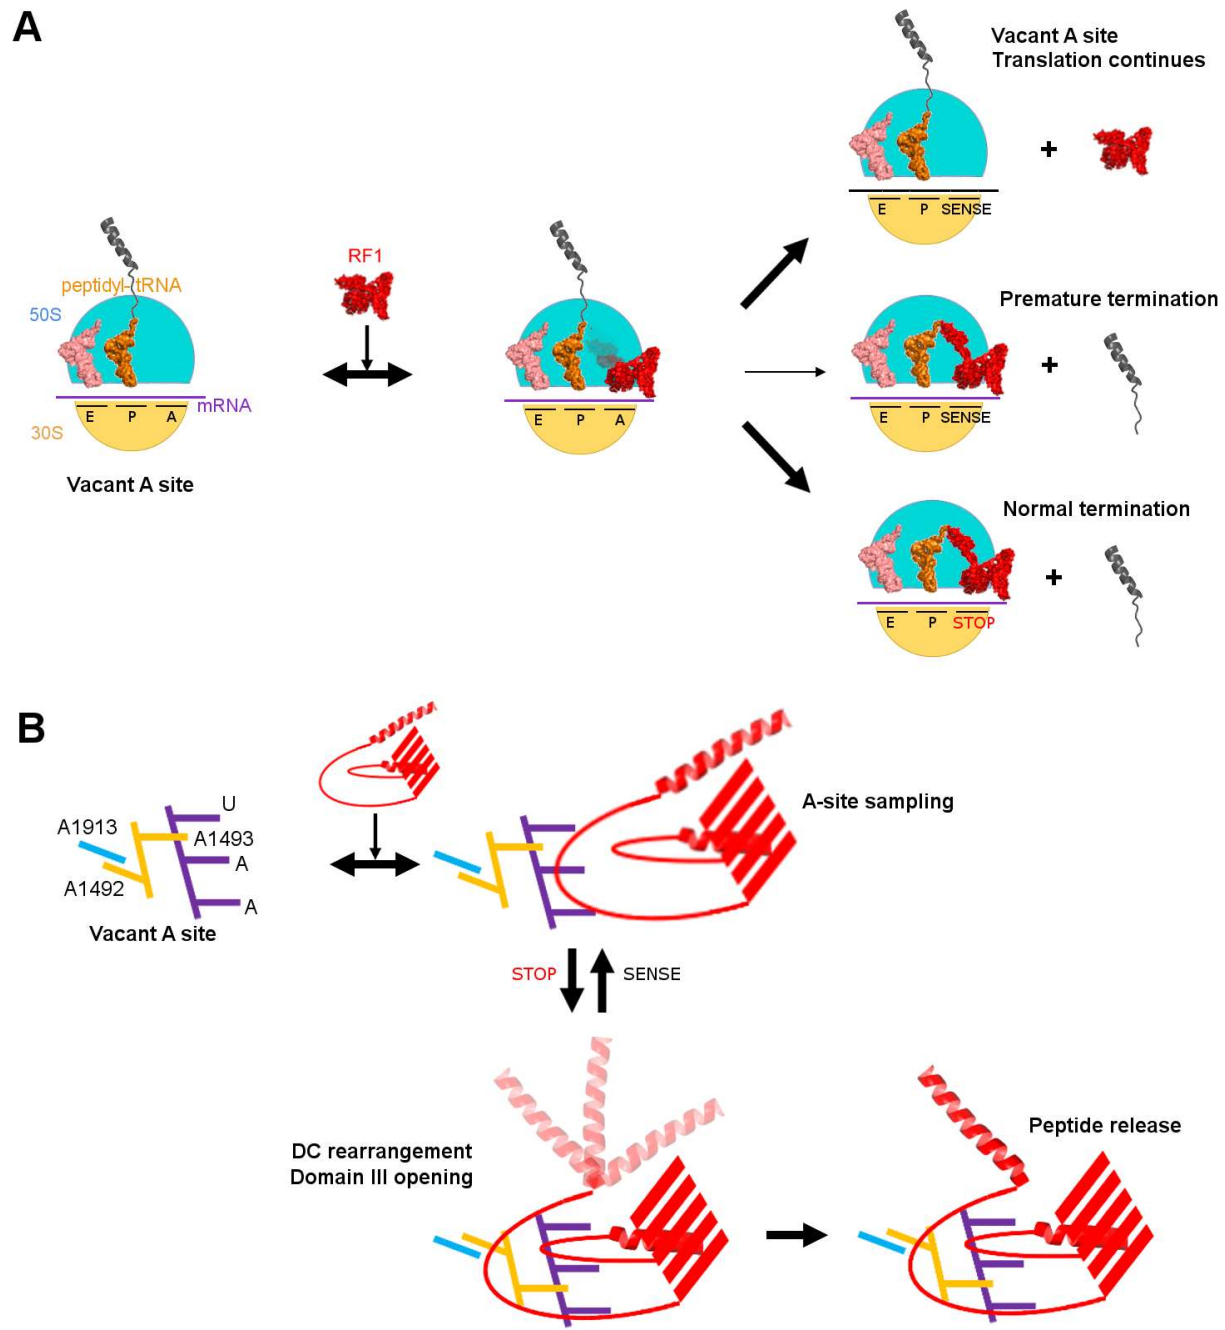

**Figure 6. Mechanism of translation termination.** (A) Schematic of global conformational rearrangements in release factor. (B) Schematic of local rearrangements in the decoding center (DC) coupled with global rearrangement in the release factor.

## **Acknowledgements**

We thank Rohini Madireddy and Gabriel Demo for help with ribosome and protein purification, staff of Argonne National Laboratory (Advanced Photon Source, beam lines 23 ID-B, 23 ID-D), SLAC National Accelerator Laboratory (Stanford Synchrotron Radiation Lightsource, beam lines 9-2, 12-2), and Brookhaven National Laboratory (National Synchrotron Light Source I, beam line X25) for the assistance with data collection; Emily Mohn and Darryl Conte Jr. for the assistance with manuscript preparation; Dmitri Ermolenko and Korostelev lab members for discussions and comments on the manuscript. This study was supported by NIH grants R01 GM107465 and P30 DK047757 (to A.A.K.). X-ray structures have been deposited to RCSB (PDB 6BOH and 6BOK).



## Materials and Methods

### ***Purification of Ribosomes and Release Factors***

*Escherichia coli* 70S ribosomes used in biochemical analyses were purified from MRE600 cells (36). *Thermus thermophilus* ribosomes (HB 27) and *E. coli* RF1<sub>ha</sub> ( $\Delta$ 302-304 RF1) were used for crystallization. C-terminally His-tagged *E. coli* RF1<sub>ha</sub> and *E. coli* RF1<sub>wt</sub>, used for peptide release assays, were purified as described (11). We previously demonstrated that *E. coli* RF1 is active on *T. thermophilus* 70S ribosomes and that this heterologous system is suitable for crystallographic studies of termination (19).

### ***Peptide Release Assays***

*E. coli* tRNA<sup>fMet</sup> (Chemical Block) was aminoacylated using [<sup>35</sup>S]-methionine (Perkin Elmer) as previously described (37). Peptide release assays were performed as described (19). The pre-termination complex was prepared by mixing [<sup>35</sup>S]-fMet-tRNA<sup>fMet</sup> with 1.5-fold molar excess of *E. coli* 70S ribosomes and incubating for 15 minutes at 37°C in buffer A (20 mM Tris·HCl (pH 7.5), 100 mM ammonium acetate, 20 mM magnesium acetate). After incubation, we diluted the complex ~20-fold to 10 nM ([<sup>35</sup>S]-fMet-tRNA<sup>fMet</sup>) in buffer A supplemented with 0.05% Triton X-100 (OmniPur) and a messenger RNA GGCAAGGAGGUAAAAAUGXYZAAAAA (XYZ stands for the A-site codon following the AUG codon placed in the P site; IDT) at 1  $\mu$ M (final concentration). After incubation for 5 minutes at 37°C, the pre-termination complex was cooled to room temperature.

In the kinetic assay, an aliquot (4.5  $\mu$ l) of the pre-termination complex was quenched in 30  $\mu$ l of 0.1 M HCl to represent the zero-time point. 45  $\mu$ l of the pre-termination complex were combined with 5  $\mu$ l of a 10-fold release factor solution. 5  $\mu$ l aliquots were quenched at different time points in 30  $\mu$ l of 0.1 M HCl. Every quenched aliquot was extracted with 700  $\mu$ l of ethylacetate and 600  $\mu$ l of the extract were mixed with 3.5 ml of scintillation liquid (Econo-Safe). The amount of released [<sup>35</sup>S]-labeled N-formyl-methionine in each aliquot was determined using a scintillation counter (Beckman Coulter, Inc.). Fitting time progress curves to a single exponential function yielded rate constants ( $k_{\text{obs}}$ ). RF1 concentrations and  $k_{\text{obs}}$  values were fitted to a hyperbola in order to obtain apparent  $k_{\text{cat}}$  values. Enzyme efficiencies ( $k_{\text{cat}}/K_{\text{M}}$ ) were determined using a

linear approximation of the Michaelis – Menten equation, omitting data points equal or greater than estimated  $K_M$  values. GraphPad Prism 7 was used for data plotting and graph drawing. Each time-progress-curve data point was obtained from two independent experiments.

### **Crystallization, Data Collection and Processing**

Crystallization of 70S•RF1 complexes formed with the UAA-containing mRNA (GGCAAGGAGGUAAAAUGUAAAAAAA) was performed essentially as described (19, 29, 38). 4  $\mu$ M (all concentrations are given for the final crystallization solution) *T. thermophilus* ribosome was incubated with 12  $\mu$ M UAA-containing mRNA, 10  $\mu$ M tRNA<sup>Met</sup>, and 16  $\mu$ M *E. coli* RF1 (RF1<sub>wt</sub> or RF1<sub>ha</sub>) in the buffer containing 25 mM Tris acetate (pH 7.0), 50 mM potassium acetate, 10 mM ammonium acetate, 10 mM magnesium acetate and 2.8 mM Deoxy Big CHAPS (Soltec Ventures). 1 mM BlaS (Fischer Scientific) was supplemented to this solution to form 70S•RF1•BlaS complex. Crystals were obtained using hanging-drop vapor diffusion over 300  $\mu$ l of 0.4-0.6 M NaCl by combining 3  $\mu$ l of the ribosome complex and 3  $\mu$ l of crystallization solution containing 0.1 M Tris•HCl (pH 7.5), 4% (v/v) PEG 20000 (Hampton Research), 8% (v/v) 2-Methyl-2,4-pentanediol (Hampton Research), and 0.2 M KSCN. Crystals were cryo-protected in four overnight steps, in which the composition of the mother liquor was incrementally adjusted to 0.1 M Tris•HCl (pH 7.5), 4.5% (v/v) PEG 20000, 10% (v/v) PEG 200 (Hampton Research), 30% (v/v) 2-methyl-2,4-pentanediol and 0.2 M KSCN. During cryo-protection of complex that contained BlaS, all cryo-protection solutions were supplemented with 0.5 mM BlaS. Crystals were frozen by plunging into liquid nitrogen.

Crystals were screened at Argonne National Laboratory (Advanced Photon Source, beam lines 23 ID-B, 23 ID-D), SLAC National Accelerator Laboratory (Stanford Synchrotron Radiation Lightsource, beam lines 9-2, 12-2), and Brookhaven National Laboratory (National Synchrotron Light Source I, beam line X25). The data that were used for structure determination were obtained at Argonne National Lab (Advanced Photon Source, beam line 23 ID-D, 1.033 Å wavelength, detector Dectris PILATUS3 6M) and Brookhaven National Laboratory (National Synchrotron Light Source I, beam line X25, 1.1 Å wavelength, detector PILATUS 6M PAD) using the 0.2° oscillation range.

The final data set for each structure was obtained by merging six data sets for the complex with RF1<sub>ha</sub>, and five data sets for the complex with RF1<sub>ha</sub> and BlaS. The data were scaled with XDS (39). Two percent of reflections in each dataset were used as a test set ( $R^{\text{free}}$  set). The starting model for molecular replacement was obtained from the previously reported structure with *E. coli* RF1 (PDB ID: 5J4D (19)), from which the stop codon, RF1 (for all complexes), and nucleotides 74-76 (CCA) of P-tRNA (for complexes with BlaS) were removed. Densities for the stop codon, RF1 codon-recognition superdomain, CCA end of the P-site tRNA and BlaS were clearly visible in unbiased  $F_o - F_c$  and FEM maps (40) calculated using PHENIX (41). We found BlaS in the same position as previously described (29). The distorted CCA end of the P-site tRNA with the intercalated BlaS in the presence of RF1 adopts the same conformation as in the complex lacking RF1 (29). Density for domain I of RF1 in the vicinity of the L11 stalk was weak in all structures reported here, as in the previously reported crystal structure of the 70S•RF1 complex (11), consistent with dynamic domain I also observed in crystal structures of *Thermus thermophilus* 70S•RF1 complexes (11, 19). Magnesium ions were modeled using CNS (42, 43). NCS-restrained simulated-annealing refinement in combination with group B-factor and TLS refinements was carried out using PHENIX (41). Data and refinement statistics are summarized in the Table 1. Figures were rendered using PyMOL (44). Rotation angles and distances between atoms were measured using Chimera (45) and PyMOL, respectively.

**Table 1.** Kinetic measurements for fMet release mediated by RF1<sub>wt</sub> and RF1<sub>ha</sub>.

| <b>A-site Codon</b>                                                      | <b>UAA</b>                    | <b>CAA</b>                    | <b>UAU</b>                    | <b>UGG</b>                    |
|--------------------------------------------------------------------------|-------------------------------|-------------------------------|-------------------------------|-------------------------------|
| <b>k<sub>cat</sub> (wt), s<sup>-1</sup></b>                              | $(7.0 \pm 1.0) \cdot 10^{-2}$ | $(1.6 \pm 0.4) \cdot 10^{-2}$ | $(5.1 \pm 1.6) \cdot 10^{-2}$ | $(1.1 \pm 0.4) \cdot 10^{-2}$ |
| <b>k<sub>cat</sub> (ha), s<sup>-1</sup></b>                              | $(5.9 \pm 0.8) \cdot 10^{-2}$ | $(1.3 \pm 0.3) \cdot 10^{-4}$ | $(2.0 \pm 0.4) \cdot 10^{-3}$ | $(2.1 \pm 0.7) \cdot 10^{-4}$ |
| <b>k<sub>cat</sub>/K<sub>M</sub> (wt), M<sup>-1</sup>·s<sup>-1</sup></b> | $\sim (1-4) \cdot 10^6$       | $(1.3 \pm 0.1) \cdot 10^4$    | $(3.5 \pm 0.3) \cdot 10^4$    | $(3.4 \pm 0.3) \cdot 10^3$    |
| <b>k<sub>cat</sub>/K<sub>M</sub> (ha), M<sup>-1</sup>·s<sup>-1</sup></b> | $\sim (0.3-2.0) \cdot 10^6$   | $(3.9 \pm 0.4) \cdot 10^2$    | $(5.6 \pm 0.3) \cdot 10^2$    | $69 \pm 9$                    |

**Table 2. Data collection and structure refinement statistics.**

|                                           | RF1 <sub>ha</sub><br>(PDB <b>6BOK</b> )       | RF1 <sub>ha</sub> -BlaS<br>(PDB <b>6BOH</b> ) |
|-------------------------------------------|-----------------------------------------------|-----------------------------------------------|
| <b>Data collection</b>                    |                                               |                                               |
| Space group                               | P2 <sub>1</sub> 2 <sub>1</sub> 2 <sub>1</sub> | P2 <sub>1</sub> 2 <sub>1</sub> 2 <sub>1</sub> |
| Cell dimensions                           |                                               |                                               |
| <i>a</i> , <i>b</i> , <i>c</i> (Å)        | 210.82, 450.45, 615.17                        | 209.86, 450.69, 615.88                        |
| $\alpha$ , $\beta$ , $\gamma$ (°)         | 90, 90, 90                                    | 90, 90, 90                                    |
| Resolution (Å)*                           | 70.0 - 3.55 (3.75-3.55)                       | 70.0 - 3.4 (3.6-3.4)                          |
| R <sub>p.i.m.</sub> <sup>#</sup>          | 0.144 (0.982)                                 | 0.129 (1.098)                                 |
| CC (1/2) <sup>##</sup>                    | 99.7 (34.7)                                   | 99.9 (29.2)                                   |
| I / $\sigma$ I                            | 7.90 (1.12)                                   | 7.75 (0.96)                                   |
| Completeness (%)                          | 100 (100)                                     | 100 (100)                                     |
| Redundancy                                | 38.5 (36.0)                                   | 38.1 (35.3)                                   |
| <b>Structure Refinement</b>               |                                               |                                               |
| Resolution (Å)                            | 32.4 - 3.55                                   | 50.0 - 3.4                                    |
| No. reflections                           | 697,897                                       | 792,518                                       |
| R <sup>work</sup> / R <sup>free</sup>     | 0.201 / 0.247                                 | 0.230 / 0.272                                 |
| Total No. atoms                           | 299,596                                       | 298,216                                       |
| Ions/water (modeled as Mg <sup>2+</sup> ) | 1,518                                         | 1,428                                         |
| <b>R.m.s. deviations</b>                  |                                               |                                               |
| Bond lengths (Å)                          | 0.009                                         | 0.008                                         |
| Bond angles (°)                           | 1.238                                         | 1.197                                         |
| Coordinate error <sup>†</sup> (Å)         | 0.5                                           | 0.6                                           |

\* Values in parentheses are for the high-resolution shell.

<sup>#</sup> R<sub>p.i.m.</sub> (precision-indicating merging R factor (46)) was calculated using SCALA, which is part of the CCP4 (47) package.

<sup>##</sup> CC(1/2) is the percentage of correlation between intensities from random half-datasets as defined by Karplus and Diederichs (48).

<sup>†</sup> Maximum-likelihood-based coordinate error is reported (41).

## References

1. Korostelev AA (2011) Structural aspects of translation termination on the ribosome. *RNA* 17(8):1409-1421.
2. Dunkle JA & Cate JH (2010) Ribosome structure and dynamics during translocation and termination. *Annu Rev Biophys* 39:227-244.
3. Zaher HS & Green R (2009) Fidelity at the molecular level: lessons from protein synthesis. *Cell* 136(4):746-762.
4. Nakamura Y & Ito K (2011) tRNA mimicry in translation termination and beyond. *Wiley Interdiscip Rev RNA* 2(5):647-668.
5. Ramakrishnan V (2011) Structural studies on decoding, termination and translocation in the bacterial ribosome. *Ribosomes: Structure, Function, and Dynamics*, eds Rodnina MV, Wintermeyer W, & Green R (Springer Vienna, Vienna), pp 19-30.
6. Freistroffer DV, Kwiatkowski M, Buckingham RH, & Ehrenberg M (2000) The accuracy of codon recognition by polypeptide release factors. *Proc Natl Acad Sci U S A* 97(5):2046-2051.
7. Rodnina MV, Pape T, Fricke R, Kuhn L, & Wintermeyer W (1996) Initial binding of the elongation factor Tu.GTP.aminoacyl-tRNA complex preceding codon recognition on the ribosome. *J Biol Chem* 271(2):646-652.
8. Thompson RC (1988) EFTu provides an internal kinetic standard for translational accuracy. *Trends Biochem Sci* 13(3):91-93.
9. Wohlgemuth I, Pohl C, Mittelstaet J, Konevega AL, & Rodnina MV (2011) Evolutionary optimization of speed and accuracy of decoding on the ribosome. *Philos Trans R Soc Lond B Biol Sci* 366(1580):2979-2986.
10. Jorgensen F, Adamski FM, Tate WP, & Kurland CG (1993) Release factor-dependent false stops are infrequent in Escherichia coli. *J Mol Biol* 230(1):41-50.
11. Laurberg M, et al. (2008) Structural basis for translation termination on the 70S ribosome. *Nature* 454(7206):852-857.
12. Rawat UB, et al. (2003) A cryo-electron microscopic study of ribosome-bound termination factor RF2. *Nature* 421(6918):87-90.
13. Trappl K & Joseph S (2016) Ribosome Induces a Closed to Open Conformational Change in Release Factor 1. *J Mol Biol* 428(6):1333-1344.
14. He SL & Green R (2010) Visualization of codon-dependent conformational rearrangements during translation termination. *Nat Struct Mol Biol* 17(4):465-470.
15. Jin H, Kelley AC, Loakes D, & Ramakrishnan V (2010) Structure of the 70S ribosome bound to release factor 2 and a substrate analog provides insights into catalysis of peptide release. *Proc Natl Acad Sci U S A* 107(19):8593-8598.
16. Klaholz BP, et al. (2003) Structure of the Escherichia coli ribosomal termination complex with release factor 2. *Nature* 421(6918):90-94.
17. Korostelev A, et al. (2008) Crystal structure of a translation termination complex formed with release factor RF2. *Proc Natl Acad Sci U S A* 105(50):19684-19689.
18. Korostelev A, Zhu J, Asahara H, & Noller HF (2010) Recognition of the amber UAG stop codon by release factor RF1. *EMBO J* 29(15):2577-2585.
19. Svidritskiy E, Madireddy R, & Korostelev AA (2016) Structural Basis for Translation Termination on a Pseudouridylated Stop Codon. *J Mol Biol* 428(10 Pt B):2228-2236.
20. Weixlbaumer A, et al. (2008) Insights into translational termination from the structure of RF2 bound to the ribosome. *Science* 322(5903):953-956.
21. Rawat U, et al. (2006) Interactions of the release factor RF1 with the ribosome as revealed by cryo-EM. *J Mol Biol* 357(4):1144-1153.



22. Shin DH, *et al.* (2004) Structural analyses of peptide release factor 1 from *Thermotoga maritima* reveal domain flexibility required for its interaction with the ribosome. *J Mol Biol* 341(1):227-239.
23. Vestergaard B, *et al.* (2001) Bacterial polypeptide release factor RF2 is structurally distinct from eukaryotic eRF1. *Mol Cell* 8(6):1375-1382.
24. Anonymous (2005) Joint Center for Structural Genomics, Crystal structure of Peptide chain release factor 1 (RF-1) (SMU.1085) from *Streptococcus mutans* at 2.34 Å resolution. DOI: 10.2210/pdb2211zbt/pdb.
25. Vestergaard B, *et al.* (2005) The SAXS solution structure of RF1 differs from its crystal structure and is similar to its ribosome bound cryo-EM structure. *Mol Cell* 20(6):929-938.
26. Zoldak G, *et al.* (2007) Release factors 2 from *Escherichia coli* and *Thermus thermophilus*: structural, spectroscopic and microcalorimetric studies. *Nucleic Acids Res* 35(4):1343-1353.
27. Demo G, *et al.* (2017) Mechanism of ribosome rescue by ArfA and RF2. *Elife* 6.
28. James NR, Brown A, Gordiyenko Y, & Ramakrishnan V (2016) Translational termination without a stop codon. *Science* 354(6318):1437-1440.
29. Svidritskiy E, Ling C, Ermolenko DN, & Korostelev AA (2013) Blastocidin S inhibits translation by trapping deformed tRNA on the ribosome. *Proc Natl Acad Sci U S A* 110(30):12283-12288.
30. Jenner L, Demeshkina N, Yusupova G, & Yusupov M (2010) Structural rearrangements of the ribosome at the tRNA proofreading step. *Nat Struct Mol Biol* 17(9):1072-1078.
31. Loveland AB, *et al.* (2016) Ribosome\*RelA structures reveal the mechanism of stringent response activation. *Elife* 5.
32. Loveland AB, Demo G, Grigorieff N, & Korostelev AA (2017) Ensemble cryo-EM elucidates the mechanism of translation fidelity. *Nature* 546(7656):113-117.
33. Hetrick B, Lee K, & Joseph S (2009) Kinetics of stop codon recognition by release factor 1. *Biochemistry* 48(47):11178-11184.
34. Indrisiunaite G, Pavlov MY, Heurgue-Hamard V, & Ehrenberg M (2015) On the pH dependence of class-1 RF-dependent termination of mRNA translation. *J Mol Biol* 427(9):1848-1860.
35. Svidritskiy E & Korostelev AA (2017) Mechanism of inhibition of translation termination by blastocidin S. *J Mol Biol* Accepted.
36. Moazed D & Noller HF (1986) Transfer RNA shields specific nucleotides in 16S ribosomal RNA from attack by chemical probes. *Cell* 47(6):985-994.
37. Lancaster L & Noller HF (2005) Involvement of 16S rRNA nucleotides G1338 and A1339 in discrimination of initiator tRNA. *Mol Cell* 20(4):623-632.
38. Svidritskiy E & Korostelev AA (2015) Ribosome Structure Reveals Preservation of Active Sites in the Presence of a P-Site Wobble Mismatch. *Structure* 23(11):2155-2161.
39. Kabsch W (2010) Xds. *Acta Crystallogr D Biol Crystallogr* 66(Pt 2):125-132.
40. Afonine PV, *et al.* (2015) FEM: feature-enhanced map. *Acta Crystallogr D Biol Crystallogr* 71(Pt 3):646-666.
41. Adams PD, *et al.* (2002) PHENIX: building new software for automated crystallographic structure determination. *Acta Crystallogr D Biol Crystallogr* 58(Pt 11):1948-1954.
42. Brunger AT, *et al.* (1998) Crystallography & NMR system: A new software suite for macromolecular structure determination. *Acta Crystallogr D Biol Crystallogr* 54(Pt 5):905-921.
43. Brunger AT, Adams PD, & Rice LM (1997) New applications of simulated annealing in X-ray crystallography and solution NMR. *Structure* 5(3):325-336.
44. DeLano WL (2002) The PyMOL Molecular Graphics System. *DeLano Scientific*.
45. Pettersen EF, *et al.* (2004) UCSF Chimera--a visualization system for exploratory research and analysis. *J Comput Chem* 25(13):1605-1612.
46. Weiss MS (2001) Global indicators of X-ray data quality. *J Appl Crystallogr* 34:130-135.
47. Bailey S (1994) The Ccp4 Suite - Programs for Protein Crystallography. *Acta Crystallogr D* 50:760-763.

48. Karplus PA & Diederichs K (2012) Linking crystallographic model and data quality. *Science* 336(6084):1030-1033.
